## Processed food intake assortativity in the personal networks of East European older adults

Marian-Gabriel Hâncean<sup>1,2</sup>, Jürgen Lerner<sup>3</sup>, Matjaž Perc<sup>4-8</sup>, José Luis Molina<sup>9</sup>, Marius Geantă<sup>2</sup>, Iulian Oană<sup>1,2</sup>, Bianca-Elena Pintoiu-Mihăilă<sup>1,2</sup>, Simona-Elena Puncioiu<sup>1,2</sup>

<sup>1</sup> Department of Sociology, University of Bucharest, Panduri 90-92, 050663 Bucharest, Romania

<sup>2</sup> Center for Innovation in Medicine, Theodor Pallady Blv. 42J, 032266 Bucharest, Romania

<sup>3</sup> Department of Computer and Information Science, University of Konstanz, 78457 Konstanz, Germany

<sup>4</sup> Faculty of Natural Sciences and Mathematics, University of Maribor, Koroška cesta 160, 2000 Maribor, Slovenia

<sup>5</sup> Department of Medical Research, China Medical University Hospital, China Medical University, Taichung 404332, Taiwan

<sup>6</sup> Community Healthcare Center Dr. Adolf Drolc Maribor, Vošnjakova ulica 2, 2000 Maribor, Slovenia

<sup>7</sup> Complexity Science Hub Vienna, Josefstädterstraße 39, 1080 Vienna, Austria

<sup>8</sup> Department of Physics, Kyung Hee University, 26 Kyungheedae-ro, Dongdaemun-gu, Seoul, Republic of Korea

<sup>9</sup> GRAFO-Department of Social and Cultural Anthropology, Universitat Autònoma de Barcelona, 08193 Bellaterra, Barcelona, Spain

## **Abstract**

Coalescing evidence shows that food habits circulate through social relationships. However, seniors' social networks and unhealthy dietary choices remain underexplored, particularly within rural Eastern Europe's unique socioeconomic and cultural contexts. We investigate how social networks affect the consumption of processed foods high in salt among community-dwelling older adults (64 years of age and older) from a Romanian rural community. We use an observational cross-sectional quantitative approach (a personal network research design) to collect self-reported information about the study participants (egos;  $n = 83$ ), their social contacts (alters), and the relationships among them (ego-alter and alter-alter ties). We fit multi-level, mixed-effects models, clustering alters by their egos, and show that older adults eating processed food high in salt are more likely to be connected to alters with similar eating habits (assortativity). This result is of particular relevance when considering the nutritional health of older adults, as it implies that interventions targeting this demographic should extend beyond the individual to encompass their social environment. Despite the cross-sectional approach limitations, our work may enrich the understanding of dietary patterns among rural Eastern European seniors and provide an empirical foundation for designing targeted interventions that can mitigate health risks associated with high-salt diets in older populations.

## **Keywords**

Processed food; older adults; social networks; assortativity; Romania; Eastern Europe

## 1. Introduction

The presence of others can significantly alter the quantity and quality of an individual's eating behaviour. The social facilitation of eating highlights how network structures influence individual actions (Herman, 2015). The influence of social connections on dietary habits represents a complex interplay of individual choices, societal norms, and interpersonal interactions. Specific network configurations lead to particular food choices and, consequentially, to a specific diet quality (Kim, 2016). Also, eating norms correlate with the need for social approval and the avoidance of disapproval. This correlation substantially affects food practices (Higgs, 2015). Essentially, social context influences eating through various mechanisms, including cultural norms and social networks (E. Robinson et al., 2013).

Available evidence substantiates that eating patterns shape and, at the same time, are shaped by social networks (Levy et al., 2021). Current research suggests that specific eating behaviour is the result of social influence. Namely, food habits circulate through social relationships, e.g., strong ties lead to similarities in food preferences (Pachucki et al., 2011), workplace networks impact employees' dietary choices (Levy et al., 2021), and men's relationships can influence dietary behaviour and weight loss (Harcourt et al., 2020). However, food habits are not merely the result of peer influence processes, norms, or social networks (Higgs & Thomas, 2016). Cultural tastes and preferences (eating included) can shape personal networks, too (Lizardo, 2006). In sum, we can identify socialization (peer influence), homophily (social selection), and environmental confounding (VanderWeele & An, 2013) as social mechanisms underpinning human behaviour and, implicitly, dietary patterns. Irrespective of the social processes at work, empirical investigations accounting for the social networks embedding individuals have the virtue of providing new insights into food consumption.

Health behaviours and states can exhibit clustering within social networks (Smith & Christakis, 2008). Namely, individuals' health correlates with the health of their social connections, such as friends, siblings, spouses, and neighbours. Social networks may be crucial in understanding human practices such as food choices or health-related behaviour (Christakis & Fowler, 2013). Nevertheless, network-oriented research work is still coalescing in this area, being in a nascent state. The few existent network studies are limited in their scope. Their focus is instead on adolescents (Becker et al., 2018; Forney et al., 2019; Zhang et al., 2018) or population samples of friends and family (Conklin et al., 2014; Levy et al., 2021). Thus, generalising findings to other age groups and cultural spaces is challenging.

Furthermore, in the case of older adults, there is mixed evidence concerning the association between social network type and dietary behaviour (Kim, 2016). Also, even if social relationships are generally linked to dietary behaviour, it is unclear which structural aspects of personal networks affect healthful dietary behaviour (Conklin et al., 2014). The investigation of how social networks influence eating habits is at a very early stage of development. Consequently, there is an evident need for more inclusive studies, such as examining food intake in older adults by comparison with other age groups.

Given the vital role that diet plays in the health and well-being of older adults (Volkert et al., 2019), and the increasing global burden of diet-related noncommunicable diseases (Qiao et al., 2022), there is a dire need to expand research into how social networks

influence dietary behaviours in the senior people. Older adults often face unique nutritional challenges (Appleton, 2009; Volkert et al., 2020), are more often in situations of increased vulnerability (Langmann, 2023) and may benefit from community and social support in maintaining a healthy diet (Seid & Babbel, 2023). This is particularly true for managing the intake of processed foods high in salt, which are linked to hypertension (Berkman et al., 2000), myocardial infarction (Bibbins-Domingo et al., 2010), stroke (Strazzullo et al., 2009), cancer (Chang et al., 2023) and other health issues. Moreover, the dietary decisions of older adults are often influenced by relationship-oriented factors such as leisure and cognitive activities, network size, marital status, or changes in social roles (Bloom et al., 2016; Conklin et al., 2014). Further research could provide valuable insights into the potential for social network interventions that could promote healthier eating habits among older adults (Smith & Christakis, 2008). Such interventions could target social norms, support behaviour change, and leverage existing relationships to mitigate the risks associated with high salt consumption (A. T. Robinson et al., 2019). Addressing unhealthy food behaviour of older adults from a social network perspective may prove beneficial for gaining insights into prevention.

The global population aged 65-year-old plus is projected to increase from 10% (2022) to 16% (2050) (United Nations Department of Economic and Social Affairs, 2022). Romania (a European Union (EU) Eastern European country) reports approximately 3.7 million people aged 65 or over (19.2% of the population) and expects to reach 27.7% in 2050 (European Union, 2022). In 2022, Romania had the fifth highest number in the EU (37.2%) of older adults at risk of poverty or social exclusion (Eurostat, 2023). The situation of Romania is not distinct from the rest of the Eastern Europe. The ageing population in Eastern Europe presents a significant demographic shift, characterized by an increasing proportion of older adults due to higher life expectancies and declining birth rates. This trend is leading to several challenges: healthcare systems are strained by the growing need for medical care specific to this age group; the economy faces pressures from a shrinking workforce and the rising demand for pensions and social services; and there is a marked urban-rural divide, with rural areas often having a higher percentage of senior residents.

Older adults living in rural areas of Eastern Europe face similar challenges influencing their health, social life, and overall well-being (European Foundation for the Improvement of Living and Working Conditions, 2023). Specifically, the seniors have limited access to healthcare, experience high levels of social isolation, rely on inadequate pensions or savings to meet their needs, have lower levels of formal education than their urban peers, and lack the infrastructure essential for comfortable ageing. On top of that, we underline the health disparities. Rural older adults may have higher rates of certain health problems (e.g., unmet dental examination) due to less access to preventive care, lifestyle factors, and the physical demands of rural living (European Parliament, 2020).

The available literature claims Eastern European countries share not only historical experiences (e.g., the transition from Communism) or trends in population ageing, but also cultural specificities of eating habits. The extant findings show, for instance, that adherence to the traditional Eastern European diet is significantly associated with risks of all-cause and cardiovascular deaths (Stefler et al., 2021).

Despite the acknowledged impact of dietary habits on health outcomes in ageing populations, the intersection of networks and dietary choices in these communities remains

underexplored, particularly within rural Eastern Europe's unique socioeconomic and cultural contexts. In this paper, we investigate the influence of social networks on the consumption of processed food high in salt in community-dwelling older adults in rural Romania, a representative Eastern European country. In the context of our study, we operationalize the influence of social networks as assortativity, i.e., similar people are more likely to be connected or share a tie (Newman, 2002). In this respect, we hypothesize that older adults eating processed food high in salt are more likely to be connected to social contacts with similar eating habits. We advance that food intake preferences are clustered in social networks and not randomly distributed. We test this hypothesis using a personal network research design (McCarty et al., 2019) on cross-sectional real-world observed social data. We collect the data from a sample of individuals living in a small Romanian rural locality. As our data are not longitudinal, we limit the scope of our study to assortativity detection. Therefore, disentangling the causes of assortativity (social selection, influence, and environmental confounding) is not the object of the current analysis. By focusing on older adults from an Eastern European rural area, our research offers valuable insights into the social determinants of dietary behaviour, contributing novel data to a previously scant area of gerontological nutrition literature. Our work may enrich the understanding of dietary patterns among rural Eastern European seniors and provide an empirical foundation for designing targeted interventions to mitigate health risks associated with high-salt diets in older populations.

## 2. Methods

### 2.1. Participants

We sampled from a small Romanian rural community (N = 4,557, September 13 – 30, 2023). Leresti locality (part of the Romanian county Arges) is 147 km North-northwest of Bucharest (the capital of Romania). We followed a personal network research design (McCarty et al., 2019). A number of 83 people (*egos* in the network science vocabulary; 18 years old plus,) responded to a complex network questionnaire. They reported information about themselves and their social contacts (the 25 *alters* with whom they interact most frequently). We collected both attribute data (socio-demographic and self-declared food intake behaviour) and relational (network) data (how study participants and their alters interact).

### 2.2. Procedures

Our research is part of the 4P-CAN project (Personalized cancer primary prevention research through citizen participation and digitally enable social innovation; HORIZON-MISS-2022-CANCER-01, project ID 101104432, programme HORIZON). This project addresses the major modifiable risk factors for cancer to improve primary prevention activities and reduce inequalities in Eastern European countries. Our paper contributes to the 4P-CAN research objectives. We collected data in one of the 4P-CAN living labs (Leresti). Before initiating our study, we informed the local authorities and community about the 4P-CAN projects' objectives through press conferences (broadcasted by local media), various meetings with community citizens, authorities and local key actors (video content is available on the project's web page and social media accounts such as LinkedIn, Facebook and X).

All methods were carried out in accordance with the relevant guidelines and regulations (specifically, those provided by the Romanian Sociologists Society, i.e., the professional association of Romanian sociologists). All the research protocol was approved by a named institutional/licensing committee. Specifically, the Ethics Committee of the Center for Innovation in Medicine (InoMed) reviewed and approved all these study procedures (EC-INOMED Decision No. D001/19-01-2024). Informed consent was obtained from all subjects. The privacy rights of the study participants were observed.

Before each interview, we explicitly informed each participant about the 4P-CAN research objectives. Participants freely signed a consent form and received a paper dossier with informative materials about the project. We granted our participants anonymity and the possibility of opting out at any moment. We informed our respondents that a special web page in Romanian with details about the methodology was specially created for them (4P-CAN, 2023). We also provided the participants with the contact details (phone numbers and email addresses) of the project director and research team in case they have future queries. We kept total transparency about the project and the research activities to facilitate citizenship engagement in the study.

We gathered the data through face-to-face interviews. On average, an interview had a duration of approximately 80 minutes. We recorded the responses using the Network Canvas software package (Complex Data Collective, 2023). Given its flexible architecture, Network

Canvas allows for an interactive data collection process wherein participants can see the questions and review their responses in real time.

We did not offer monetary compensation to the study participants. Nevertheless, we rewarded them by providing free access to a local educational program focused on health topics and a hotline number in case they need a secondary opinion on medical problems or healthy nutrition.

We employed a link-tracing sampling methodology to recruit participants, i.e., a respondent-driven sampling variant (Hâncean et al., 2021; Molina et al., 2022). Due to its expected superior response rates, we used this sampling technique, not a probabilistic non-network random sampling strategy. In a face-validity manner, we considered a network-oriented sampling method more appropriate given the questionnaire size (eventually, our response rate was 56%).

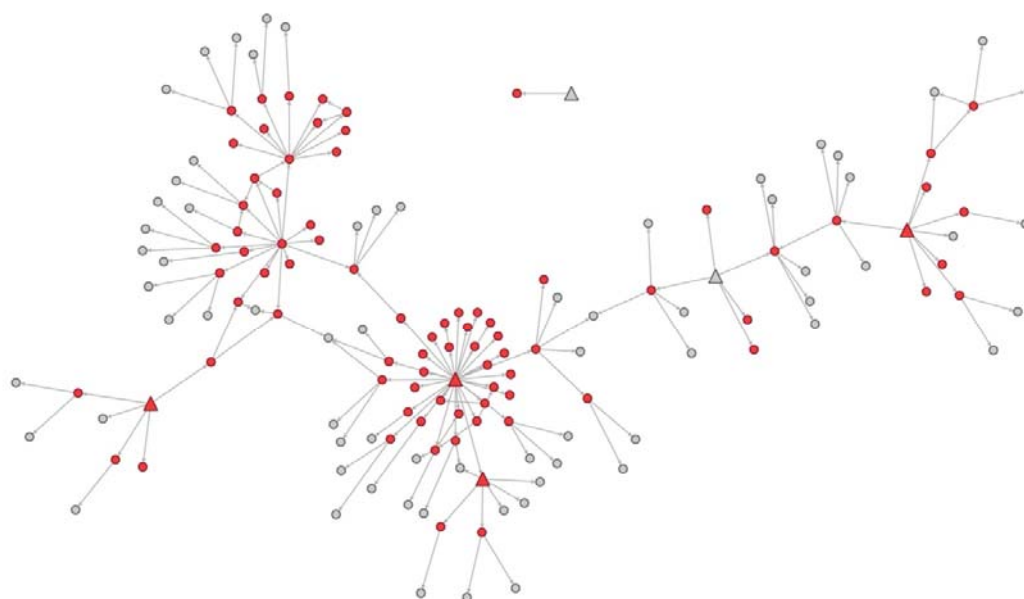

**Fig. 1.** Link-tracing sampling. The triangles mark the seeds (initial people invited by the researchers to participate in the study). The circles indicate people referenced by other study participants. The red indicates participation, while the grey marks non-participation for various reasons (refusals, rescheduling, etc.). The arrows show the referee–referral chains.

**Fig. 1** illustrates the sampling procedure. We began with six individuals (the seeds). We invited these people to respond to our questionnaire and recommend other interested peers (we did not restrict the possible number of recommendations). We selected the seeds based on ethnographic fieldwork (June – September 2023) that preceded the face-to-face interviews. (During the fieldwork, we explored the community, developed local connections, presented the project to the authorities, took notes about the local realities, etc.). We were interested in having seeds with a different socio-demographic profile (as possible) located in different geographical points of the community (despite its small size of 140,49 km<sup>2</sup>). Notably, our seeds were different in sex (four males and two females), age (*Range* = 30, *Min* = 34, *Max* = 64), personal income (three below and three above the average national net

salary), employment sector (one retired, three employed in public sector, one employed in private sector and one self-employed) and education (four with BA studies and two with high-school diploma). Two of the six seeds refused to participate as an interviewee, yet they still made recommendations for participation.

After interviewing the seeds, we continued to collect data from the people recommended by each seed and, then, from the persons recommended by the people recommended by the seeds, and so on. Essentially, we followed referee-referral chains as depicted in **Fig. 1**. We stopped the data collection process when our sample ( $n = 83$ ) had individuals of various socio-demographic profiles: sex (males and females), age (young, adults and older adults), education (university, high school, elementary), and personal income (below and above the average national net salary).

### 2.3. Data

#### 2.3.1. Network data

We asked each participant (ego) to nominate a maximum of 25 social contacts (alters) (Maya Jariego, 2018), i.e., people with whom they interact most frequently (18-year-old plus). *Please nominate 25 people (18 years old plus) you interact with (or meet). You can start with the people you interact with most often. These may be family members, friends, acquaintances, neighbours, work colleagues, etc.* This question allowed us to create a list of ego-alter ties for each participant.

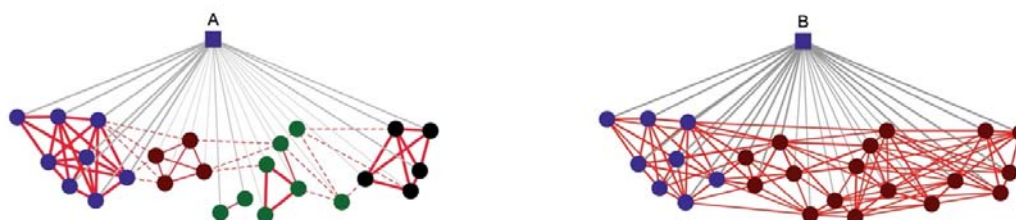

**Fig. 2.** An illustration of two personal networks. The square nodes represent the egos (the study participants), whereas the circles mark the alters (the social contacts elicited by the egos). The colours indicate the alters' status in relation to the ego: blue (family members), dark red (close friends), green (simple friends), and black (acquaintances). The colours of the ties mark either ego-alter ties (grey) or alter-alter ties (red). The weight of grey ties marks the ego-alter meeting frequency (weight increases as meeting frequency increases). The weight of the red ties marks the type of the alter-alter ties (very thick lines: close friends; simple lines: simple friends; interrupted lines: acquaintances). Images A and B visually illustrate the idea of network density (proportion of materialized alter-alter ties in each personal network). Network A has a lower network density score in comparison to B. Both networks have a size of 25 (this corresponds to the number of alters).

Furthermore, each ego evaluated each pair of alters (alter-alter tie): whether the elicited social contacts know each other personally. And if they do, whether they are *close friends*, *simple friends* or *acquaintances*. In this way, we eventually created a personal



network for each ego. **Fig. 2** presents two personal networks as an illustration. For each ego-alter tie, we asked our respondents information about the frequency of the meetings (*How often do you typically meet with each of the people you previously mentioned?* Responses: *Daily, weekly, every two weeks, once a month, a few times a year, once a year, less than once a year*) and their emotional closeness (*How emotionally close do you feel to the people you previously mentioned?* Responses: *Very close, close, not very close, not close at all*). We used this information to estimate the intensity of each ego-alter relationship. First, we dichotomized meeting frequency (Daily meeting = 1, the rest of the responses = 0) and emotional closeness (very close = 1, the rest of the responses 0). Second, we multiplied the binary variants of meeting frequency and emotional closeness and obtained the intensity of an ego-alter tie.

We employed the network information to create two network-level variables for each of the 83 personal networks: the network size (the number of elicited alters) and the network density (the number of observed alter-alter ties divided by the number of theoretically possible alter-alter ties).

### 2.3.2. Attribute data

Participants provided information about their sex (as assigned at birth: male or female), date of birth, last level of education, occupational status (active or retired), civil status (single or in a relationship), personal income level (above or below the national average net salary) and if they practice any sport (yes/no). The egos gave information about each of their nominated alters: age (in completed years), sex (male or female), education (last level), and whether they were on a diet or had any sport as a hobby (yes/no).

We computed the Body Mass Index (BMI) for each ego based on self-declared weight (in Kg) and height (in cm). We divided the weight by the height squared. Then, we classified the resulting scores into "underweight" (less than 18.5), "normal" (18.5 – 24.9), "overweight" (24.9 – 29.9) and "obesity" (higher than 29.9). We also measured our respondents' perceptions of their alters' BMI. Namely, we administered pictorial images of females and males (Harris et al., 2008) to our respondents. We registered the reported corresponding BMI class for each alter (social contact), i.e., ten classes from A to J corresponding to underweight, normal weight, overweight, class I, II and III obesities.

We measured the consumption of possessed food high in salt (PFHS) by administering a pictorial image to our respondents (See Supplementary Material, Fig 1S, available in Hâncean et al. 2024). Each participant reported the frequency of PFHS intake for them and their elicited alters (*How often do you (How often does alter) consume foods similar to the ones depicted in this pictorial image?* Responses: *daily, weekly, every two weeks, once a month, a few times a year, once a year, less than once a year, never*). We dichotomized the responses into a binary variable: whether the ego (alter) eats PFHS food *frequently (daily or weekly)*. We built the pictorial image using the guidelines available in the WHO STEPS Surveillance Manual (World Health Organization, 2017). The pictorial image included canned noodle soup, pretzels and chips, burgers, pizza, canned food and a deli meats platter. We adapted the image to the Romanian cultural specificities by including pickled food and grilled minced meat.

### 2.3.3. Compositional data

Based on the information reported by the ego, for each personal network, we computed *the proportion of alters* by sex (e.g., proportion of females), age categories (young [18 – 30-year-old], middle [31 – 63 year-old] and older adults [64 year-old and older]), education (e.g., proportion of alters with a university degree), BMI class (e.g., proportion of alters with obesity), diet (proportion of alters on a diet), sport (proportion of alters with a sport as a hobby), PFHS intake (proportion of alters that eat PFHS frequently), closeness (proportion of alters nominated as very emotionally close) and meeting frequency (proportion of alters that ego meets daily).

### 2.3.4. The assortativity variable

We computed a food intake assortativity variable for each alter embedded in a personal (ego) network. Namely, the difference between *the proportion of the alter's neighbours who eat PFHS frequently* and *the proportion of alters in the entire ego network that eat PFHS frequently (without the alter of reference)*. (Eating PFHS is a dichotomized variable, where 1 means frequent processed food intake and 0 does not.) The assortativity variable tests whether alters' PFHS intake associates with the PFHS intake of those to which they are connected (their social contacts). The assortativity variable tells us whether an alter's neighbours eat PFHS more or less frequently than all the alters in the ego network. The normalization obtained by subtracting the average PFHS intake overall alters (minus the alter of reference) in a network is necessary. Without this normalization, the effect of this variable would be confounded by the overall ratio of alters frequently eating PFHS in an ego network. (Variation of PFHS ratios over the different ego networks is controlled for by random ego-level effects). Across the 83 ego networks, we dropped the alters without neighbours from the analysis. The assortativity variable was undefined in their case. **Fig. 3** visually illustrates the logic behind the assortativity variable. In the displayed personal network, alter  $k$  has four neighbours (1, 2, 3, and 4), of which only two eat PFHS frequently (3 and 4). In the entire personal network, there are 24 alters (plus the alter of reference,  $k$ , that we exclude from the calculations), and six alters eat PFHS frequently (see the red nodes). The assortativity variable would equal  $2/4 - 6/24 = 1/4$ . This result means that the neighbours of alter  $k$  have an average PFHS intake behaviour above the average PFHS intake behaviour in the personal network (they are more likely to eat PFHS frequently than the rest of the alters in the same network). The alter of reference is not included in the computation to avoid circular dependency in the data. Here, we replicate the mathematical formula used to assess assortativity in the case of COVID-19 vaccination (Hâncean et al. 2023).

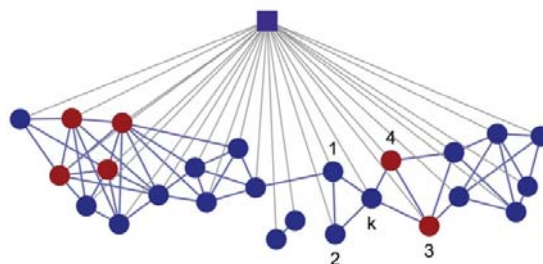

**Fig. 3.** The distribution of processed food high in salt (PFHS) intake behaviour in a personal network. The colours indicate eating patterns: red marks people who eat PFHS frequently, whereas blue marks people who eat PFHS less frequently. The geometrical shapes present the ego (the square) and the social contacts (the circles). Alter-alter ties are in blue, and ego-alter ties are in grey. In the personal network, we observe 25 alters and one ego. Alter  $K$  has four neighbours (1, 2, 3, and 4).

#### 2.4 Statistical analysis

First, we performed a statistical summary to characterize the study participants in the sample (egos) and their social contacts (alters). Second, we fit multi-level, mixed-effects binary logistic regression models, clustering alters by their egos, to predict alters' PFHS intake behaviour (1 = eating PFHS frequently, 0 = eating PFHS less frequently). In these models, we controlled for the attributes of alters (sex, age category, whether they are on a diet and BMI), of egos (sex, age, education, income, PFHS intake, whether they live single and have a sport as a hobby), and for network properties (network density and size, the intensity of ego-alter ties). We also included the assortativity variable as our key predictor. Third, we fit standard logistic regression models with binomial distribution to predict egos' PFHS intake behaviour (1 = eating PFHS frequently, 0 = eating PFHS less frequently). Again, we controlled for the attributes of egos, for the proportion of alters in the personal networks (females, older adults, alters with obesity and alters on a diet), and for network characteristics (intensity of ego-alter ties and network density). In the models, we introduced the proportion of alters that eat PFHS frequently as a key variable to detect assortativity. We reported additional details about the regression models (ICC, AIC, BIC, number of observations and pseudo- $R^2$ ) and considered statistically significant effects with  $p$ -values less than 0.05 from two-sided tests. We prepared detailed diagnostics about the regression models in the Supplementary Material while the data for replication is openly available (Hâncean et al. 2024).

In our study, we hypothesized that older adults eating processed food high in salt are more likely to be connected to alters with similar eating habits. We specified this hypothesis before the data were collected. We built the statistical models so that we can test the hypothesis.

### 3. Results

#### 3.1. Descriptive statistics for the variables of interest

**Table 1** reports the characteristics of the study participants (egos) and their social contacts (alters). The average age of the egos is 54.3 years (standard deviation, *SD*: 15.7). Most of the participants are females (53%), have a personal income below the average national net salary (77%), are not single (87%), and do not have a university degree (18% + 37% = 55%). Also, 54% do not do any sport, and 46% eat PFHS regularly (daily or weekly). Looking at the composition of the 83 personal networks, we note that the average proportion of females is 0.53, of older adults is 0.28, of alters on a diet is 0.13, of alters with obesity is 0.36, and of alters that eat PFHS regularly is 0.43. The egos have relatively dense networks (*M*: 0.7, *SD*: 0.2) and, on average, a network size of 23.7 (*SD*: 3.1).

Most of the egos' social contacts are females (53%), overweight and with obesity (17% + 13% + 9% + 7% + 4% + 3% + 1% = 54%), and not on a diet (82%). A consistent share of the alters eat PFHS regularly (43%) and are older adults (64-year-old and older: 29%). The assortativity variable is positive (*M*: 0.002, *SD*: 0.11). This indicates that, on average, the neighbours of a specific alter have a PFHS intake behaviour above the PFHS intake behaviour computed for the entire ego network. The average intensity of ego-alter ties across networks is 0.12 (*SD*: 0.33). This value suggests that across the 83 personal networks, we have a small share of alters that egos meet daily and consider very close emotionally.

**Table 1**

Descriptive statistics of the variables of interest. Characteristics of the study participants (egos) and their social contacts

| The egos (n = 83)                |               | The social contacts of the egos (n = 1970) |                |
|----------------------------------|---------------|--------------------------------------------|----------------|
| Variables                        | Statistics    | Variables                                  | Statistics     |
| Sex, no. (%)                     |               | Eating PFHS, no. (%)                       |                |
| 0 [male]                         | 39 (47%)      | 0 [No]                                     | 941 (48%)      |
| 1 [female]                       | 44 (53%)      | 1 [Yes]                                    | 847 (43%)      |
| Age, years, mean (SD) NA         | 54.3 (15.7) 0 | NA                                         | 182 (9%)       |
| Education, no. (%)               |               | Sex, no. (%)                               |                |
| 0 [elementary]                   | 15 (18%)      | 0 [male]                                   | 921 (47%)      |
| 1 [high school]                  | 31 (37%)      | 1 [female]                                 | 1049 (53%)     |
| 2 [university]                   | 37 (45%)      | Age category, no. (%)                      |                |
| Single, no. (%)                  |               | 0 [young: 18 – 29-year-old]                | 190 (10%)      |
| 0 [No]                           | 72 (87%)      | 1 [middle: 30 – 63-year-old]               | 1214 (62%)     |
| 1 [Yes]                          | 11 (13%)      | 2 [older adult: 64-year-old +]             | 566 (29%)      |
| Personal income, no. (%)         |               | Diet, no. (%)                              |                |
| 0 [below national avg.]          | 64 (77%)      | 0 [No]                                     | 1607 (82%)     |
| 1 [above, national avg.]         | 17 (20%)      | 1 [Yes]                                    | 282 (14%)      |
| NA                               | 2 (3%)        | NA                                         | 81 (4%)        |
| Doing sport, no. (%)             |               | BMI, no. (%)                               |                |
| 0 [No]                           | 45 (54%)      | 1 [under-weight]                           | 201 (10%)      |
| 1 [Yes]                          | 38 (46%)      | 2 [normal weight]                          | 284 (14%)      |
| Eating PFHS, no. (%)             |               | 3 [normal weight]                          | 405 (21%)      |
| 0 [No]                           | 45 (54%)      | 4 [over-weight]                            | 343 (17%)      |
| 1 [Yes]                          | 38 (46%)      | 5 [obesity - I]                            | 250 (13%)      |
| Prop. females, mean (SD), NA     | 0.53 (0.19) 0 | 6 [obesity - I]                            | 181 (9%)       |
| Prop. older adults               | 0.28 (0.22) 0 | 7 [obesity - II]                           | 134 (7%)       |
| Prop. alters on diet             | 0.13 (0.13) 1 | 8 [obesity - II]                           | 76 (4%)        |
| Prop. alters with obesity (BMI)  | 0.36 (0.18) 1 | 9 [obesity - III]                          | 53 (3%)        |
| Prop. PFHS intake by alters      | 0.43 (0.34) 0 | 10 [obesity - III]                         | 21 (1%)        |
| Avg. intensity of ego-alter ties | 0.12 (0.14) 0 | NA                                         | 22 (1%)        |
| Netw. size, mean (SD), NA        | 23.7 (3.1) 0  | Ego-alter tie intens., mean (SD), NA       | 0.12 (0.33) 0  |
| Netw. density, mean (SD), NA     | 0.7 (0.2) 0   | Assortativity, mean (SD), NA               | 0.00 (0.1) 192 |

SD = standard deviation. NA = missing data. Netw. = Network. intens. = intensity. Prop. = proportion. PFHS = processed food high in salt. Avg. = average.

### 3.2. Predicting the food intake for participants' social contacts (*alters*)

**Table 2** shows the results of two multi-level logistic regression models that predict the PFHS intake behaviour of the egos' social contacts (*alters*). In Model 1, we look at the individuals' attributes (*alters* and *egos*) while controlling for the size of the personal networks ('network size'). We observe that *alter age* and *alter being on a diet* are negatively associated with PFHS intake. Our data (1,693 valid observations from 80 personal networks) suggest that younger people are more likely (OR 0.57,  $p$  0.00) and individuals on a diet are less likely (OR 0.23,  $p$  0.00) to eat PFHS regularly. However, social contacts with higher BMI are perceived as more likely to consume PFHS (OR 1.44,  $p$  0.00). Also, the *alters* embedded in the personal networks of males (OR 0.26,  $p$  0.04) and of egos that eat PFHS regularly (OR 4.81,  $p$  0.02) are more likely to be perceived as eating PFHS regularly.

In Model 2, we add structural features to evaluate the role of network characteristics in shaping food habits. First of all, the results suggest similar trends in the attributes of the egos and *alters*. This indicates consistency in the attributes influencing PFHS intake. *Alters'* age (OR 0.58,  $p$  0.00), diet (OR 0.23,  $p$  0.00), and BMI (OR 1.45,  $p$  0.00) have (almost) identical contributions to predicting PFHS intake as in Model 1. The same interpretation applies to egos' sex (OR 0.25,  $p$  0.05) and PFHS intake behaviour (OR 4.73,  $p$  0.02). Second, the assortativity variable positively associates with the dependent variable (OR 1.17,  $p$  0.01). If assortativity increases by one standard deviation, then PFHS odds increases by 17%.

The high ICC values in both models (0.67 and 0.66) underscore the substantial impact of the network context, as evidenced by the variability in the PFHS intake behaviour across different personal networks ( $SD$ : 2.56 and 2.55). The fixed pseudo- $R^2$  values indicate that fixed effects account for approximately 17% of the variance in the outcome. The total models (the total pseudo- $R^2$  values) explain about 72% of the variance, highlighting the substantial contribution of the random effects structure to the model.

**Table 2**

Multi-level logistic regression models. Predicting the intake of processed food high in salt for alters based on the characteristics of egos, alters and network features (assortativity included).

|                                       | Model 1             |      | Model 2             |      |
|---------------------------------------|---------------------|------|---------------------|------|
|                                       | OR (95% CI)         | p    | OR (95% CI)         | p    |
| (Intercept)                           | 0.79 (0.20 - 3.08)  | 0.73 | 0.82 (0.20 - 3.36)  | 0.79 |
| <i>Attributes of alters</i>           |                     |      |                     |      |
| Sex                                   | 0.86 (0.64 - 1.16)  | 0.32 | 0.85 (0.63 - 1.15)  | 0.29 |
| Age category                          | 0.57 (0.48 - 0.68)  | 0.00 | 0.58 (0.49 - 0.69)  | 0.00 |
| Diet                                  | 0.23 (0.15 - 0.35)  | 0.00 | 0.23 (0.15 - 0.35)  | 0.00 |
| BMI                                   | 1.44 (1.24 - 1.67)  | 0.00 | 1.45 (1.24 - 1.69)  | 0.00 |
| <i>Attributes of egos</i>             |                     |      |                     |      |
| Sex                                   | 0.26 (0.07 - 0.95)  | 0.04 | 0.25 (0.06 - 0.98)  | 0.05 |
| Age                                   | 1.05 (0.56 - 2.00)  | 0.87 | 1.02 (0.53 - 1.98)  | 0.95 |
| Education                             | 0.55 (0.28 - 1.10)  | 0.09 | 0.53 (0.26 - 1.11)  | 0.09 |
| Single                                | 0.72 (0.12 - 4.28)  | 0.72 | 0.63 (0.10 - 3.92)  | 0.62 |
| Income                                | 0.79 (0.15 - 4.29)  | 0.79 | 0.81 (0.15 - 4.35)  | 0.80 |
| Sport                                 | 1.37 (0.38 - 4.94)  | 0.63 | 1.38 (0.38 - 4.95)  | 0.62 |
| Processed food intake                 | 4.81 (1.31 - 17.56) | 0.02 | 4.73 (1.27 - 17.54) | 0.02 |
| <i>Network properties</i>             |                     |      |                     |      |
| Intensity of ego-alter tie            |                     |      | 0.95 (0.61 - 1.49)  | 0.83 |
| Network density                       |                     |      | 0.92 (0.46 - 1.85)  | 0.82 |
| Assortativity effect                  |                     |      | 1.17 (1.03 - 1.32)  | 0.01 |
| Network size                          | 1.02 (0.61 - 1.71)  | 0.93 | 1.01 (0.60 - 1.68)  | 0.98 |
| <hr/>                                 |                     |      |                     |      |
| ICC                                   | 0.67                |      | 0.66                |      |
| N (observations)                      | 1693                |      | 1693                |      |
| N (groups: ego-networks)              | 80                  |      | 80                  |      |
| Group-level variation (SD)            | 2.56                |      | 2.55                |      |
| AIC                                   | 1546.67             |      | 1546.33             |      |
| BIC                                   | 1622.75             |      | 1638.71             |      |
| Pseudo-R <sup>2</sup> (fixed effects) | 0.17                |      | 0.17                |      |
| Pseudo-R <sup>2</sup> (total)         | 0.72                |      | 0.72                |      |

All continuous predictors are mean-centred and scaled by one standard deviation. The outcome variable is in its original units. OR = odds ratio. CI = confidence interval.

### 3.3. Predicting the food intake for participants (egos)

**Table 3** presents two logistic regression models that predict whether study participants eat PFHS regularly. Model 3 examines the effects of the egos' and alters' attributes on the binary outcome. The model shows no significant improvement over the null model ( $\chi^2$  (10) 13.12,  $p$  0.22) and a modest explanatory power (Cragg-Uhler 0.21). The lack of significant predictors indicates that individual characteristics of egos and alters do not have a distinguishable impact on the dietary behaviour of interest. Notably, the propensity to engage in sports activities, suggests a negative association with the frequency of PFHS intake (OR 0.33,  $p$  0.04).

Model 4 expands upon Model 3 and includes additional variables related to the ego-network structure and the proportion of alters in a network that eats PFHS regularly (another way of measuring assortativity). This model demonstrates a significant improvement over the null model ( $\chi^2$  (13) 28.67,  $p$  0.01) and displays greater explanatory power (Cragg-Uhler 0.41). In this model, sports activity is also a significant predictor (OR 0.24,  $p$  0.03), reinforcing the

potential influence of physical activity on dietary behaviour. The presence of seniors within the network (proportion of older adult alters) is also significant (OR 0.33,  $p$  0.03), and the network density shows a significant negative association with the outcome (OR 0.43,  $p$  0.03). A notable finding is the significant positive effect of the proportion of alters regularly eating PFHS food (Prop. PFHS intake: OR 2.42,  $p$  0.01). This finding suggests that egos are substantially more likely to consume PFHS as the number of their social contacts that eat PFHS food regularly increases. The proportion of alters on a diet (Prop. alters on a diet: OR 1.82,  $p$  0.06) is not statistically significant.

The comparison of Models M3 and M4 highlights the importance of including network characteristics and alters' dietary habits to enhance the understanding of PFHS frequency behaviours within ego networks. While individual demographics alone offer limited insight, incorporating network structure and alters' eating regularity in Model M4 provides a more nuanced understanding of the determinants of dietary behaviour.

The consistency in the significance of sports activity across both models suggests a robust relationship between physical activity and dietary behaviour, potentially indicating a lifestyle cluster within the ego networks. The findings underscore the need for a multifaceted approach when studying dietary behaviours, accounting for personal attributes and the broader social and network contexts.



**Table 3**

Simple logistic regression models predicting the intake of processed food that is high in salt for study participants (egos) based on their attributes, the attributes of their social contacts (alters) and network features (assortativity included).

|                                                   | Model 3                         |      | Model 4                         |      |
|---------------------------------------------------|---------------------------------|------|---------------------------------|------|
|                                                   | OR (95% CI)                     | p    | OR (95% CI)                     | p    |
| (Intercept)                                       | 1.60 (0.50 - 5.13)              | 0.43 | 2.18 (0.55 - 8.60)              | 0.27 |
| <i>Attributes of egos</i>                         |                                 |      |                                 |      |
| Sex                                               | 0.39 (0.08 - 1.80)              | 0.23 | 0.21 (0.03 - 1.47)              | 0.12 |
| Age                                               | 0.92 (0.41 - 2.08)              | 0.85 | 1.28 (0.51 - 3.22)              | 0.60 |
| Education                                         | 1.14 (0.65 - 2.01)              | 0.64 | 1.14 (0.57 - 2.26)              | 0.71 |
| Single                                            | 3.22 (0.68 - 15.30)             | 0.14 | 2.93 (0.52 - 16.69)             | 0.22 |
| Income                                            | 1.31 (0.35 - 4.94)              | 0.69 | 1.47 (0.35 - 6.27)              | 0.60 |
| Sport                                             | 0.33 (0.11 - 0.95)              | 0.04 | 0.24 (0.07 - 0.85)              | 0.03 |
| <i>Ego-network composition (alter attributes)</i> |                                 |      |                                 |      |
| Prop. females                                     | 1.51 (0.71 - 3.25)              | 0.29 | 2.28 (0.88 - 5.89)              | 0.09 |
| Prop. older adults                                | 0.63 (0.28 - 1.42)              | 0.27 | 0.33 (0.12 - 0.92)              | 0.03 |
| Prop. alters with obesity (BMI)                   | 1.33 (0.78 - 2.27)              | 0.29 | 1.53 (0.83 - 2.84)              | 0.18 |
| Prop. alters on diet                              | 1.39 (0.82 - 2.36)              | 0.23 | 1.82 (0.97 - 3.42)              | 0.06 |
| Prop. PFHS intake                                 |                                 |      | 2.42 (1.26 - 4.65)              | 0.01 |
| <i>Network properties</i>                         |                                 |      |                                 |      |
| Intensity of ego-alter ties (avg.)                |                                 |      | 0.65 (0.24 - 1.73)              | 0.39 |
| Network density                                   |                                 |      | 0.43 (0.20 - 0.92)              | 0.03 |
| N (observations: egos)                            | 79                              |      | 79                              |      |
| AIC                                               | 116.86                          |      | 107.31                          |      |
| BIC                                               | 142.93                          |      | 140.49                          |      |
| Pseudo-R <sup>2</sup> (Cragg-Uhler)               | 0.21                            |      | 0.41                            |      |
|                                                   | $\chi^2(10) = 13.12 (p = 0.22)$ |      | $\chi^2(13) = 28.67 (p = 0.01)$ |      |

All continuous predictors are mean-centred and scaled by one standard deviation. The outcome variable is in its original units. OR = odds ratio. CI = confidence interval. PFHS intake = proportion of alters that eat PFHS regularly. Prop. = Proportion. avg. = Average.

## 4. Discussion

Our study explores the influence of social networks on the eating habits of older adults dwelling in rural regions of Eastern Europe, namely Romania. The assortativity effect (Model 2, OR 1.17,  $p$  0.01) is statistically significant, highlighting the potential for dietary habits to propagate within social networks, possibly creating clusters of similar eating behaviours. This effect may be more pronounced in older adults, who may rely more heavily on their immediate social circles due to potential limitations in their social interactions. This result is consistent with the concept of homophily in social networks (Hâncean et al., 2022a, 2022b; Lerner & Hâncean, 2023; McPherson et al., 2001) or the social contagion of obesity (Christakis & Fowler, 2013). Also, it underscores the need for interventions that engage with the social environment to promote healthier eating habits (Bahr et al., 2009).

The substantial intra-class correlation coefficients in the multi-level regression models (M1: 0.67 & M2: 0.66) emphasize the impact of network context on PFHS intake behaviour, suggesting that personal networks may significantly shape individuals' dietary patterns (Pachucki et al., 2011). This insight is of particular relevance when considering the nutritional health of older adults, as it implies that interventions targeting this demographic should extend beyond the individual to encompass their social environment.

The analysis of egos' social contacts also reveals a distinct negative association between age and the consumption of PFHS, with older adults (alters) demonstrating a lower propensity for such dietary choices (M1: OR 0.57,  $p$  0.00 & M2: OR 0.58,  $p$  0.00). This result aligns with the broader literature indicating a generational divide in dietary preferences, as younger individuals have been shown to have a higher inclination towards processed foods (Monteiro et al., 2018; Popkin, 2006). Also, this finding may be influenced by regional economic and availability factors specific to Eastern Europe that merit further investigation.

Additionally, the alters who adhere to a diet are markedly less likely to eat PFHS (M1 & M2: OR 0.23,  $p$  0.00), indicating potentially a conscientious shift towards healthier eating habits. This finding resonates with previous work (Fiese et al., 2012) that emphasizes the role of individual agency and family rituals in shaping eating practices. However, our study did not explore the nature of these diets. Future research should uncover whether these are formally prescribed diets, self-directed diets, or culturally prevalent eating patterns and how adherence was achieved.

The positive correlation between BMI and PFHS intake (M1: OR 1.44,  $p$  0.00 & M2: OR 1.45,  $p$  0.00) raises concerns about the dietary patterns of individuals with a higher body mass index, perhaps caught in a reinforcing cycle of poor nutritional choices. The complex interplay between dietary choices and metabolic health has been extensively documented (Swinburn et al., 2011). Our study is limited to only underscoring the need to investigate the causal pathways linking dietary behaviours and body weight (Malik et al., 2013).

Turning to the analysis of the egos' PFHS intake, we suggest that individual characteristics in isolation may not sufficiently explain variations in PFHS consumption. However, introducing network structure measurements improves explanatory power in our logistic regression models. Notably, including the proportion of older adult alters within the network as a significant predictor (M4: OR 0.33,  $p$  0.03) highlights the potential role of this demographic in influencing overall network dietary behaviour. The positive effect of the

proportion of alters that regularly eat PFHS (M4: OR 2.42,  $p$  0.01) can suggest a significant likelihood of individuals adapting their eating habits to mirror those of their social contacts who frequently consume PFHS (an assortativity effect). This result is particularly relevant for older adults, who may be more exposed to and influenced by the dietary patterns prevalent within their close-knit social networks.

The robust relationship between physical activity and egos' dietary behaviour, as evidenced by the significance of sports activity across models (M3: OR 0.33,  $p$  0.04 & M4: OR 0.24,  $p$  0.03), merits attention. This association may reflect a lifestyle pattern within ego networks where healthier physical activity levels correlate with more nutritious dietary choices. Our findings must be contextualized within the broader scientific discourse, particularly considering Eastern Europe's socio-cultural and economic backdrop (Goryakin et al., 2015). The intersection of physical activity and dietary behaviour necessitates a more nuanced future analysis, potentially informed by the available evidence in the field (Warburton et al., 2006), highlighting the synergistic effects of lifestyle factors on health.

There are several limits that the readers should note while interpreting our results. First, our study relies on cross-sectional data, meaning separating social selection and influence in the context of assortativity is impossible. For instance, it cannot be ascertained whether being in a network with PFHS intake leads to consuming more processed food (social influence) or if individuals with a preference for PFHS are more likely to form connections with similar dietary habits (social selection). Additionally, cross-sectional designs do not account for periods when processed food intake might be higher or lower (temporal biases). Collecting longitudinal network data in the future can aim to disentangle social selection and influence and improve self-reporting accuracy. Second, the link-tracing sampling of the study participants has inherent selection biases. For example, more health-conscious individuals may be more willing to participate in a study about prevention, which could skew the results. Similar food intake studies focused on East European countries are rare and employ different methodologies (Boylan et al., 2009; Krivonos & Kuhn, 2019), which makes result validation almost impossible. Third, an inherent feature of personal network research designs is that egos report data about themselves and their social contacts. While this type of network research design offers valuable insights into understanding food intake, it may be challenging to control for various biases, such as the false consensus effect (the tendency to see one's own choices replicated in the others) (Ross et al., 1977) and recall biases (inaccurate reports about PFHS consumption). We tried to manage the false consensus bias by controlling, in our models, the ego-alter tie intensity. Yet, data collected on longitudinal cohorts (balanced panels) can improve the accuracy of self-reported information in the future. Fourth, the generalization of our findings to the entire population is affected by its lack of representativeness.

Our study discusses the impact of assortativity within personal networks on dietary behaviour, specifically among older people in rural Eastern Europe who face various vulnerabilities. Consistent with the social integration theory (Berkman et al., 2000), our findings suggest that personal relationships and networks can profoundly impact health behaviours, including diet. It underscores the complexity of dietary choices, shaped by individual characteristics and personal networks (direct alters). A detailed understanding of these social variables is crucial for older adults, whose eating habits are vital for the

promotion of healthy ageing and well-being. This knowledge can be utilised to create specific interventions aimed at encouraging better nutrition and cultivating healthier food habits. Community-based interventions can draw inspiration from the social-ecological model of health promotion (Stokols, 1996).

**Declarations of interest:** none.

### **Data availability**

The dataset analysed in the current study is made openly available in the Zenodo data repository as Hâncean, M.-G., Lerner, J., Perc, M., Molina, J.L., Geantă, M., Oană, I., Pintoiu-Mihăilă, B.-E., & Puncioiu, S.-E. (2024). Replication data for: Processed food intake assortativity in the personal networks of East European older adults. Zenodo. <https://doi.org/10.5281/zenodo.10534214>

### **Funding**

M.-G.H., M.G., B.-E.P.-M., I.O. and S.-E.P. were supported by the 4P-CAN project, HORIZON-MISS-2022-CANCER-01, project ID 101104432, programme HORIZON; J.L. was supported by Deutsche Forschungsgemeinschaft (DFG 321869138); M.P. was supported by the Slovenian Research Agency (Javna agencija za raziskovalno dejavnost RS) (Grant Nos. P1-0403). The funding sources had no involvement in study design, in the collection, analysis and interpretation of data, in writing the paper and in the decision to submit the article for publication.

### **Acknowledgement**

We express our gratitude to Dr. Cosmina Cioroboiu, Dr. Bianca Cucos, Florin Găină, Bogdan-Adrian Vidrascu, Isabela Tincă, and Dr. Maria-Cristina Ghită for their valuable contributions to this study.

### **Author contributions**

M.-G.H.: Writing, Visualization, Conceptualization, Methodology, Software, Formal analysis, Investigation, Data curation. J.L.: Writing, Conceptualization, Validation, Methodology, Software, Formal analysis. M.P., J.L.M.: Writing, Conceptualization, Validation. M.G.: Conceptualization, Investigation, Resources, Writing. B.-E.P.-M.: Visualization, Investigation, Data curation, Writing. I.O.: Writing, Investigation, Data curation, Methodology. S.-E.P.: Investigation, Data curation. All authors approved the final version of the paper and accept full responsibility for all aspects of the work described.

### **References**

Appleton, K. M. (2009). Increases in energy, protein and fat intake following the addition of sauce to an older person's meal. *Appetite*, 52(1), 161–165. <https://doi.org/10.1016/j.appet.2008.09.009>

- Bahr, D. B., Browning, R. C., Wyatt, H. R., & Hill, J. O. (2009). Exploiting social networks to mitigate the obesity epidemic. *Obesity*, *17*(4), 723–728.  
<https://doi.org/10.1038/oby.2008.615>
- Becker, K. R., Stojek, M. M., Clifton, A., & Miller, J. D. (2018). Disordered eating in college sorority women: A social network analysis of a subset of members from a single sorority chapter. *Appetite*, *128*, 180–187. <https://doi.org/10.1016/j.appet.2018.06.013>
- Berkman, L. F., Glass, T., Brissette, I., & Seeman, T. E. (2000). From social integration to health: Durkheim in the new millennium. *Social Science & Medicine*, *51*(6), 843–857.  
[https://doi.org/10.1016/S0277-9536\(00\)00065-4](https://doi.org/10.1016/S0277-9536(00)00065-4)
- Bibbins-Domingo, K., Chertow, G. M., Coxson, P. G., Moran, A., Lightwood, J. M., Pletcher, M. J., & Goldman, L. (2010). Projected effect of dietary salt reductions on future cardiovascular disease. *New England Journal of Medicine*, *362*(7), 590–599.  
<https://doi.org/10.1056/NEJMoa0907355>
- Bloom, I., Edwards, M., Jameson, K. A., Syddall, H. E., Dennison, E., Gale, C. R., Baird, J., Cooper, C., Aihie Sayer, A., & Robinson, S. (2016). Influences on diet quality in older age: The importance of social factors. *Age and Ageing*, *46*(2), 277–283.  
<https://doi.org/10.1093/ageing/afw180>
- Boylan, S., Welch, A., Pikhart, H., Maljutina, S., Pajak, A., Kubinova, R., Bragina, O., Simonova, G., Stepaniak, U., Gilis-Januszewska, A., Milla, L., Peasey, A., Marmot, M., & Bobak, M. (2009). Dietary habits in three Central and Eastern European countries: The HAPIEE study. *BMC Public Health*, *9*(1), 439.  
<https://doi.org/10.1186/1471-2458-9-439>
- Chang, K., Gunter, M. J., Rauber, F., Levy, R. B., Huybrechts, I., Kliemann, N., Millett, C., & Vamos, E. P. (2023). Ultra-processed food consumption, cancer risk and cancer mortality: A large-scale prospective analysis within the UK Biobank. *eClinicalMedicine*, *56*, 101840. <https://doi.org/10.1016/j.eclinm.2023.101840>
- Christakis, N. A., & Fowler, J. H. (2013). Social contagion theory: Examining dynamic social networks and human behavior. *Statistics in Medicine*, *32*(4), 556–577.  
<https://doi.org/10.1002/sim.5408>
- Complex Data Collective. (2023). *Network Canvas: Interviewer* (v6.5.2) [Computer software]. Zenodo. <https://doi.org/10.5281/zenodo.6026548>
- Conklin, A. I., Forouhi, N. G., Surtees, P., Khaw, K.-T., Wareham, N. J., & Monsivais, P. (2014). Social relationships and healthful dietary behaviour: Evidence from over-50s in the EPIC cohort, UK. *Social Science & Medicine*, *100*(100), 167–175.  
<https://doi.org/10.1016/j.socscimed.2013.08.018>
- European Foundation for the Improvement of Living and Working Conditions. (2023). *Bridging the rural–urban divide: Addressing inequalities and empowering communities*. Publications Office of the European Union, Luxembourg.  
<https://data.europa.eu/doi/10.2806/647715>
- European Parliament, D. G. for P. R. S. (2020). *Older people in the European Union's rural areas: Issues and challenges*: in depth analysis. Publications Office of the European Union, Luxembourg. <https://data.europa.eu/doi/10.2861/114962>
- European Union. (2022, December 14). *Reform of long-term care services for older people*. Retrieved 05/01/2024 from <https://commission.europa.eu/projects/reform-long-term->

- care-services-older-people\_en#:~:text=Romania%20has%20a%20rapidly%20ageing,and%20life%20expectancy%20to%20increase.
- [dataset] Eurostat. (2023). *Persons at risk of poverty or social exclusion by age and sex*. Retrieved 05/01/2024 from [https://ec.europa.eu/eurostat/databrowser/view/ILC\\_PEPS01N\\_\\_custom\\_5119699/default/table?lang=en](https://ec.europa.eu/eurostat/databrowser/view/ILC_PEPS01N__custom_5119699/default/table?lang=en)
- Fiese, B. H., Hammons, A., & Grigsby-Toussaint, D. (2012). Family mealtimes: A contextual approach to understanding childhood obesity. *Economics & Human Biology*, 10(4), 365–374. <https://doi.org/10.1016/j.ehb.2012.04.004>
- Forney, K. J., Schwendler, T., & Ward, R. M. (2019). Examining similarities in eating pathology, negative affect, and perfectionism among peers: A social network analysis. *Appetite*, 137, 236–243. <https://doi.org/10.1016/j.appet.2019.03.013>
- Goryakin, Y., Lobstein, T., James, W. P. T., & Suhrcke, M. (2015). The impact of economic, political and social globalization on overweight and obesity in the 56 low and middle income countries. *Social Science & Medicine*, 133, 67–76. <https://doi.org/10.1016/j.socscimed.2015.03.030>
- [dataset] Hâncean, M.-G., Lerner, J., Perc, M., Molina, J.L., Geantă, M., Pintoiu-Mihăilă, B.-E., Oană, I., & Puncioiu, S.-E. (2024). Replication data for: Processed food intake assortativity in the personal networks of East European older adults. Zenodo. <https://doi.org/10.5281/zenodo.10534214>
- Hâncean, M.-G., Lerner, J., Perc, M., Molina, J.L., & Geantă, M. (2023). *Assortative mixing of opinions about COVID-19 vaccination in personal networks*. Research Square. <https://doi.org/10.21203/rs.3.rs-2719341/v1>
- Hâncean, M.-G., Ghită, M. C., Perc, M., Lerner, J., Oană, I., Mihăilă, B.-E., Stoica, A. A., & Bunaciu, D.-A. (2022a). Disaggregated data on age and sex for the first 250 days of the COVID-19 pandemic in Bucharest, Romania. *Scientific Data*, 9(1). <https://doi.org/10.1038/s41597-022-01374-7>
- Hâncean, M.-G., Lerner, J., Perc, M., Oană, I., Bunaciu, D.-A., Stoica, A. A., & Ghită, M.-C. (2022b). Occupations and their impact on the spreading of COVID-19 in urban communities. *Scientific Reports*, 12(1), 14115. <https://doi.org/10.1038/s41598-022-18392-5>
- Hâncean, M.-G., Lubbers, M. J., & Molina, J. L. (2021). Measuring transnational social fields through binational link-tracing sampling. *PLOS ONE*, 16(6), e0253042. <https://doi.org/10.1371/journal.pone.0253042>
- Harcourt, K. A., Appleton, J., Clegg, M. E., & Hunter, L. (2020). The influence of social relationships on men's weight. *Journal of Nutrition Education and Behavior*, 52(2), 106–113. <https://doi.org/10.1016/j.jneb.2019.08.009>
- Harris, C. V., Bradlyn, A. S., Coffman, J., Gunel, E., & Cottrell, L. (2008). BMI-based body size guides for women and men: Development and validation of a novel pictorial method to assess weight-related concepts. *International Journal of Obesity*, 32(2), 336–342. <https://doi.org/10.1038/sj.ijo.0803704>
- Herman, C. P. (2015). The social facilitation of eating. A review. *Appetite*, 86, 61–73. <https://doi.org/10.1016/j.appet.2014.09.016>

- Higgs, S. (2015). Social norms and their influence on eating behaviours. *Appetite*, *86*, 38–44. <https://doi.org/10.1016/j.appet.2014.10.021>
- Higgs, S., & Thomas, J. (2016). Social influences on eating. *Current Opinion in Behavioral Sciences*, *9*, 1–6. <https://doi.org/10.1016/j.cobeha.2015.10.005>
- Kim, C.-O. (2016). Food choice patterns among frail older adults: The associations between social network, food choice values, and diet quality. *Appetite*, *96*, 116–121. <https://doi.org/10.1016/j.appet.2015.09.015>
- Krivonos, E., & Kuhn, L. (2019). Trade and dietary diversity in Eastern Europe and Central Asia. *Food Policy*, *88*, 101767. <https://doi.org/10.1016/j.foodpol.2019.101767>
- Langmann, E. (2023). Vulnerability, ageism, and health: Is it helpful to label older adults as a vulnerable group in health care? *Medicine, Health Care and Philosophy*, *26*(1), 133–142. <https://doi.org/10.1007/s11019-022-10129-5>
- Lerner, J., & Hâncean, M.-G. (2023). Micro-level network dynamics of scientific collaboration and impact: Relational hyperevent models for the analysis of coauthor networks. *Network Science*, *11*(1), 5–35. <https://doi.org/10.1017/nws.2022.29>
- Levy, D. E., Pachucki, M. C., O'Malley, A. J., Porneala, B., Yaqubi, A., & Thorndike, A. N. (2021). Social connections and the healthfulness of food choices in an employee population. *Nature Human Behaviour*, *5*(10), 1349–1357. <https://doi.org/10.1038/s41562-021-01103-x>
- Lizardo, O. (2006). How cultural tastes shape personal networks. *American Sociological Review*, *71*(5), 778–807. <https://doi.org/10.1177/000312240607100504>
- Malik, V. S., Pan, A., Willett, W. C., & Hu, F. B. (2013). Sugar-sweetened beverages and weight gain in children and adults: A systematic review and meta-analysis. *The American Journal of Clinical Nutrition*, *98*(4), 1084–1102. <https://doi.org/10.3945/ajcn.113.058362>
- Maya Jariego, I. (2018). Why name generators with a fixed number of alters may be a pragmatic option for personal network analysis. *American Journal of Community Psychology*, *62*(1–2), 233–238. <https://doi.org/10.1002/ajcp.12271>
- McCarty, C., Lubbers, M. J., Molina, J. L., & Vacca, R. (2019). *Conducting personal network research: A practical guide*. The Guilford Press.
- McPherson, M., Smith-Lovin, L., & Cook, J. M. (2001). Birds of a feather: Homophily in social networks. *Annual Review of Sociology*, *27*(1), 415–444. <https://doi.org/10.1146/annurev.soc.27.1.415>
- Molina, J. L., Lubbers, M. J., Hâncean, M.-G., & Fradejas-García, I. (2022). Short take: Sampling from transnational social fields. *Field Methods*, *34*(3), 256–264. <https://doi.org/10.1177/1525822X221105920>
- Monteiro, C. A., Cannon, G., Moubarac, J.-C., Levy, R. B., Louzada, M. L. C., & Jaime, P. C. (2018). The UN Decade of Nutrition, the NOVA food classification and the trouble with ultra-processing. *Public Health Nutrition*, *21*(1), 5–17. <https://doi.org/10.1017/S1368980017000234>
- Newman, M. E. J. (2002). Assortative mixing in networks. *Physical Review Letters*, *89*(20), 208701. <https://doi.org/10.1103/PhysRevLett.89.208701>

- Pachucki, M. A., Jacques, P. F., & Christakis, N. A. (2011). Social network concordance in food choice among spouses, friends, and siblings. *American Journal of Public Health, 101*(11), 2170–2177. <https://doi.org/10.2105/AJPH.2011.300282>
- Popkin, B. M. (2006). Global nutrition dynamics: The world is shifting rapidly toward a diet linked with noncommunicable diseases. *The American Journal of Clinical Nutrition, 84*(2), 289–298. <https://doi.org/10.1093/ajcn/84.2.289>
- Qiao, J., Lin, X., Wu, Y., Huang, X., Pan, X., Xu, J., Wu, J., Ren, Y., & Shan, P. (2022). Global burden of non-communicable diseases attributable to dietary risks in 1990–2019. *Journal of Human Nutrition and Dietetics, 35*(1), 202–213. <https://doi.org/10.1111/jhn.12904>
- Robinson, A. T., Edwards, D. G., & Farquhar, W. B. (2019). The influence of dietary salt beyond blood pressure. *Current Hypertension Reports, 21*(6), 42. <https://doi.org/10.1007/s11906-019-0948-5>
- Robinson, E., Blissett, J., & Higgs, S. (2013). Social influences on eating: Implications for nutritional interventions. *Nutrition Research Reviews, 26*(2), 166–176. <https://doi.org/10.1017/S0954422413000127>
- Ross, L., Greene, D., & House, P. (1977). The "false consensus effect": An egocentric bias in social perception and attribution processes. *Journal of Experimental Social Psychology, 13*(3), 279–301. [https://doi.org/10.1016/0022-1031\(77\)90049-X](https://doi.org/10.1016/0022-1031(77)90049-X)
- Seid, A. M., & Babbel, N. F. (2023). Behavioral model-guided nutritional counseling could improve the dietary practice and nutritional status of elders in Ethiopia: A quasi-experimental study. *BMC Geriatrics, 23*(1), 757. <https://doi.org/10.1186/s12877-023-04433-9>
- Smith, K. P., & Christakis, N. A. (2008). Social networks and health. *Annual Review of Sociology, 34*(1), 405–429. <https://doi.org/10.1146/annurev.soc.34.040507.134601>
- Stefler, D., Brett, D., Sarkadi-Nagy, E., Kopczyńska, E., Detchev, S., Bati, A., Scrob, M., Koenker, D., Aleksov, B., Douarin, E., Simonova, G., Malyutina, S., Kubinova, R., Pajak, A., Ruiz, M., Peasey, A., Pikhart, H., & Bobak, M. (2021). Traditional Eastern European diet and mortality: Prospective evidence from the HAPIEE study. *European Journal of Nutrition, 60*(2), 1091–1100. <https://doi.org/10.1007/s00394-020-02319-9>
- Stokols, D. (1996). Translating social ecological theory into guidelines for community health promotion. *American Journal of Health Promotion, 10*(4), 282–298. <https://doi.org/10.4278/0890-1171-10.4.282>
- Strazzullo, P., D’Elia, L., Kandala, N.-B., & Cappuccio, F. P. (2009). Salt intake, stroke, and cardiovascular disease: Meta-analysis of prospective studies. *BMJ, 339*, b4567. <https://doi.org/10.1136/bmj.b4567>
- Swinburn, B. A., Sacks, G., Hall, K. D., McPherson, K., Finegood, D. T., Moodie, M. L., & Gortmaker, S. L. (2011). The global obesity pandemic: Shaped by global drivers and local environments. *The Lancet, 378*(9793), 804–814. [https://doi.org/10.1016/S0140-6736\(11\)60813-1](https://doi.org/10.1016/S0140-6736(11)60813-1)
- United Nations Department of Economic and Social Affairs, P. D. (2022). *World population prospects 2022: Summary of results*. UN DESA/POP/2022/TR/NO. 3. Retrieved 05/01/2024 from



- [https://www.un.org/development/desa/pd/sites/www.un.org.development.desa.pd/files/wpp2022\\_summary\\_of\\_results.pdf](https://www.un.org/development/desa/pd/sites/www.un.org.development.desa.pd/files/wpp2022_summary_of_results.pdf)
- VanderWeele, T. J., & An, W. (2013). Social networks and causal inference. In S. L. Morgan (Ed.), *Handbook of causal analysis for social research* (353-374.). Springer Netherlands. [https://doi.org/10.1007/978-94-007-6094-3\\_17](https://doi.org/10.1007/978-94-007-6094-3_17)
- Volkert, D., Beck, A. M., Cederholm, T., Cruz-Jentoft, A., Goisser, S., Hooper, L., Kiesswetter, E., Maggio, M., Raynaud-Simon, A., Sieber, C. C., Sobotka, L., van Asselt, D., Wirth, R., & Bischoff, S. C. (2019). ESPEN guideline on clinical nutrition and hydration in geriatrics. *Clinical Nutrition*, 38(1), 10–47. <https://doi.org/10.1016/j.clnu.2018.05.024>
- Volkert, D., Visser, M., Corish, C. A., Geisler, C., De Groot, L., Cruz-Jentoft, A. J., Lohrmann, C., O'Connor, E. M., Schindler, K., & De Van Der Schueren, M. A. E. (2020). Joint action malnutrition in the elderly (MaNuEL) knowledge hub: Summary of project findings. *European Geriatric Medicine*, 11(1), 169–177. <https://doi.org/10.1007/s41999-019-00264-3>
- Warburton, D. E. R., Nicol, C.W., & Bredin, S. S. D. (2006). Health benefits of physical activity: The evidence. *Canadian Medical Association Journal*, 174(6), 801–809. <https://doi.org/10.1503/cmaj.051351>
- World Health Organization. (2017, January 26). *WHO STEPS surveillance manual: the WHO STEPwise approach to chronic disease risk factor surveillance*. Retrieved 17/06/2023 from [https://cdn.who.int/media/docs/default-source/ncds/ncd-surveillance/steps/steps-manual.pdf?sfvrsn=c281673d\\_8](https://cdn.who.int/media/docs/default-source/ncds/ncd-surveillance/steps/steps-manual.pdf?sfvrsn=c281673d_8)
- Zhang, S., De La Haye, K., Ji, M., & An, R. (2018). Applications of social network analysis to obesity: A systematic review. *Obesity Reviews*, 19(7), 976–988. <https://doi.org/10.1111/obr.12684>
- 4P-CAN. (2023). Living Labs. Retrieved 05/01/2024 from <https://4p-can.eu/living-labs/>
